# Supplementary material
Source: publisher figshare collection journal article supplement (https://karger.figshare.com/articles/dataset/_/9742463)
Supplement: Supplementary file 1 [file 1]

# Supplementary Figures

**LOR to anti-TNF is associated with low/undetectable serum drug concentration in 50-70% of cases**

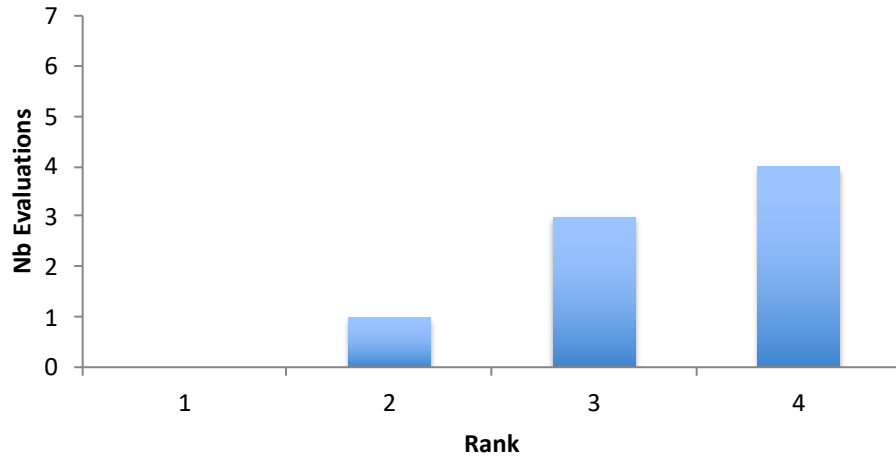

**In CD/UC, LOR has been associated with low/undetectable serum drug concentrations**

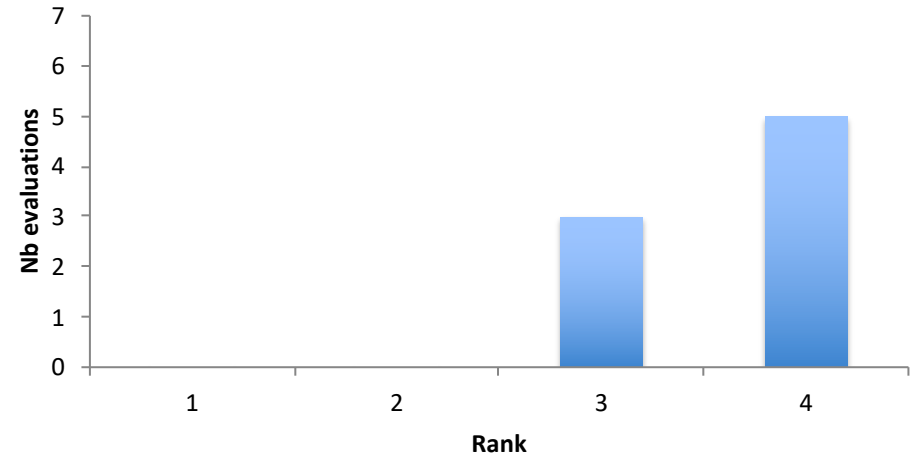

**Accelerated drug clearance can be caused by an immunogenic reaction with formation of ADA**

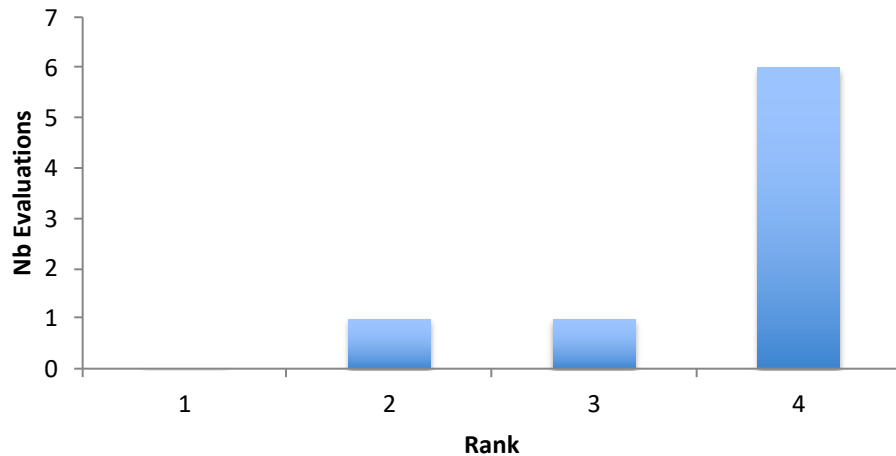

**Accelerated drug clearance can be caused by non-immune mediated mechanisms**

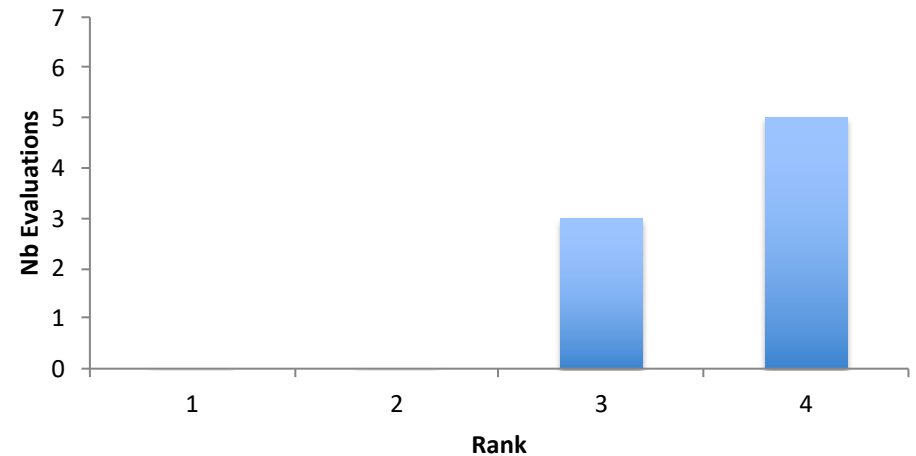

**Supplementary Figure 1:** Results after the first round of vote in the Delphi-style process for relevance of adequate anti-TNF drug concentrations. Each of the eight specialists ranked the statements by agreement from rank 1 (strong disagreement) to rank 4 (strong agreement). Y-axis shows number of specialists choosing each rank. ADA, anti-drug-antibodies; LOR, loss of response

**Severity and extent of IBD**

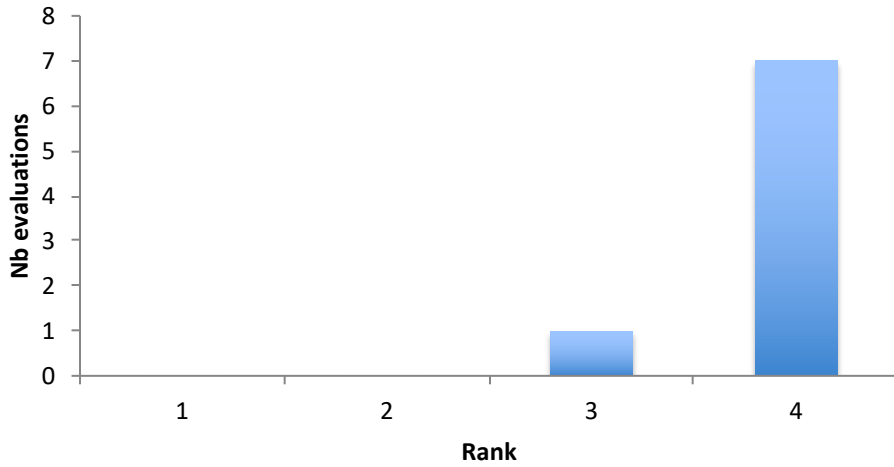

**Male sex**

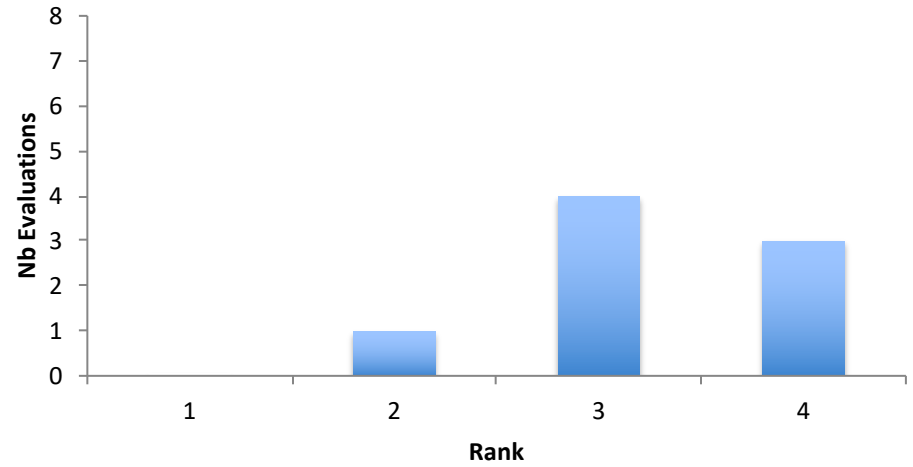

**BMI**

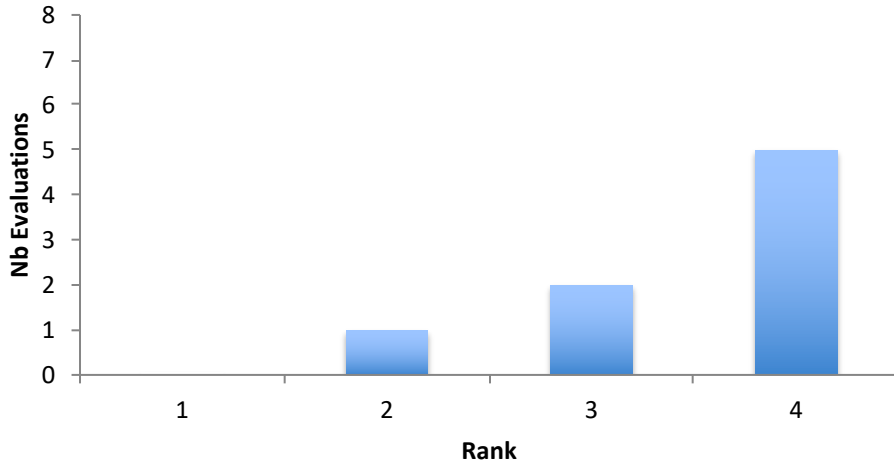

**Concomitant IM use**

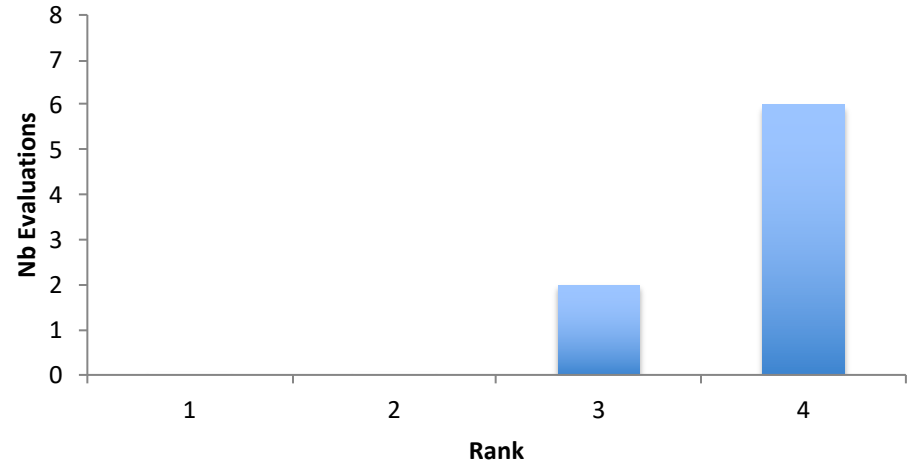

**Supplementary Figure 2:** Results after the first round of vote in the Delphi-style process for identification of factors affecting non-immune-mediated drug clearance. Each of the eight specialists ranked these factors by agreement from rank 1 (strong disagreement) to rank 4 (strong agreement). Y-axis shows number of specialists choosing each rank. BMI, body mass index; IM, immunomodulators

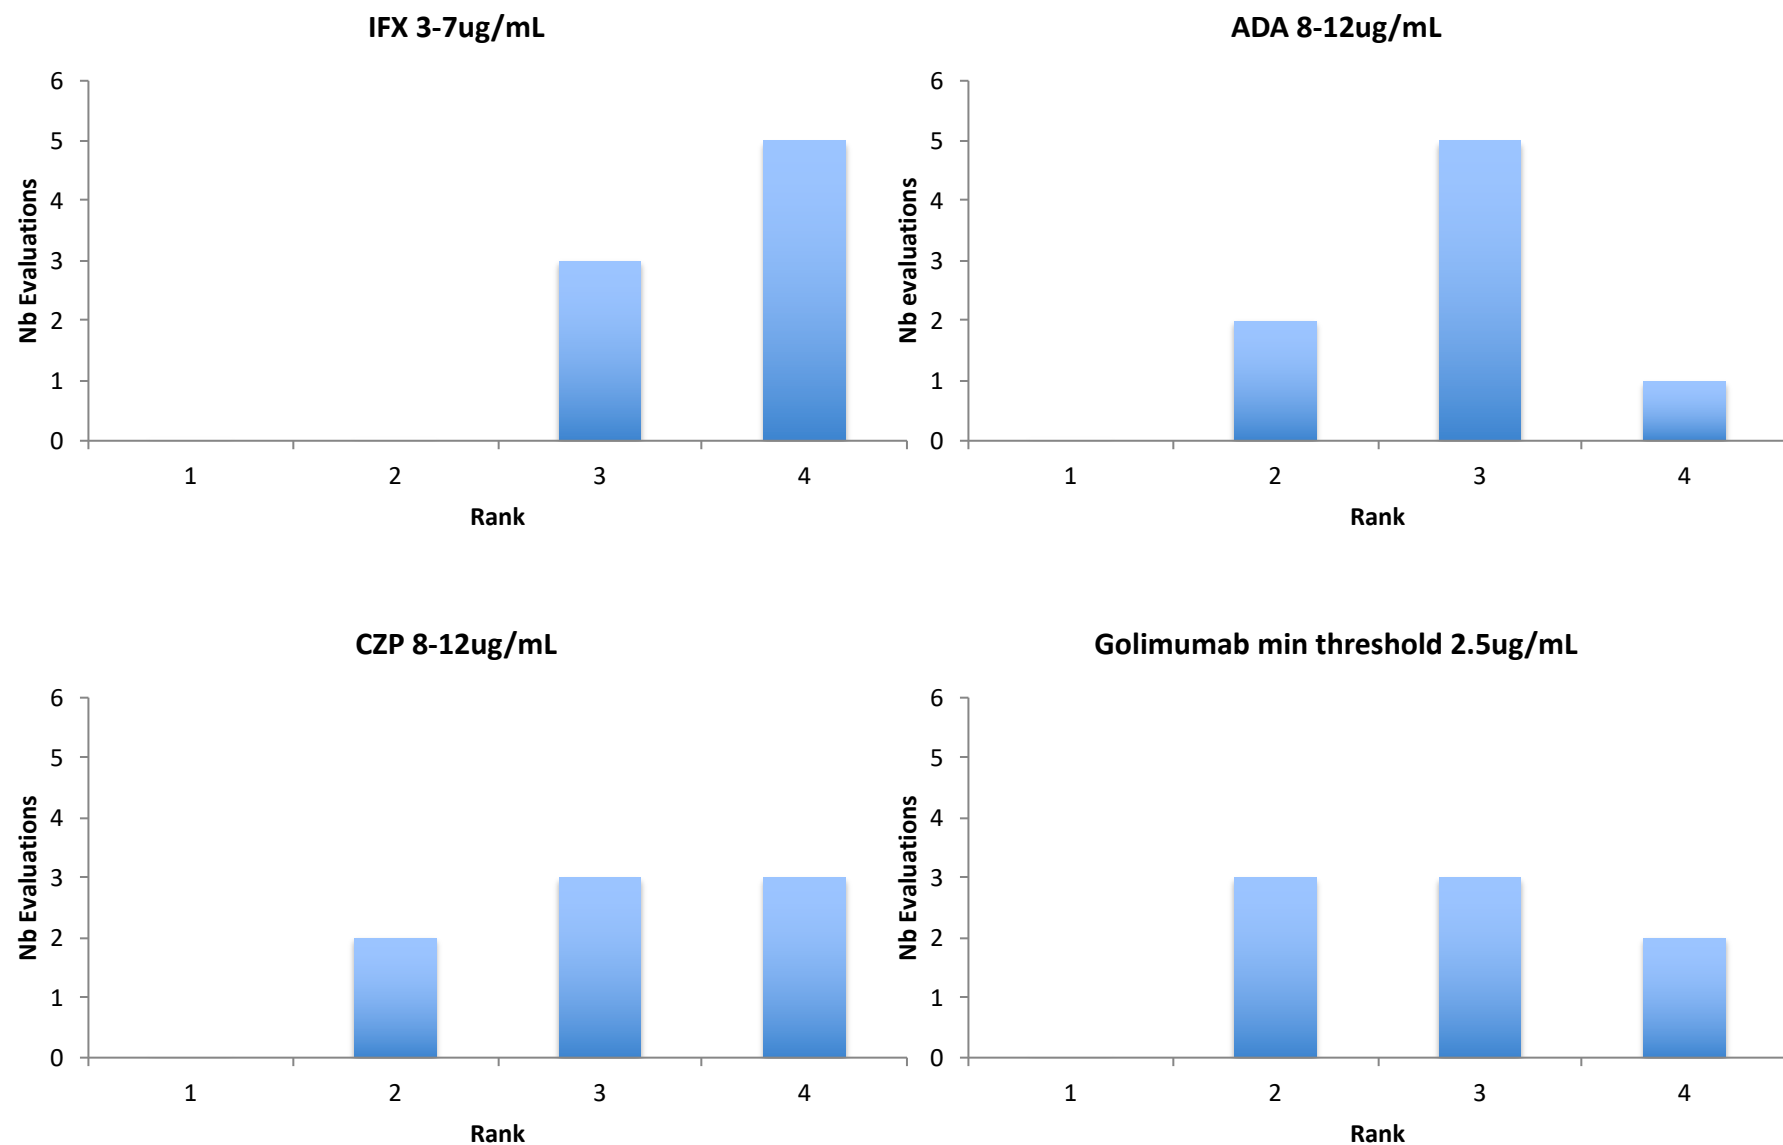

**Supplementary Figure 3:** Results after the first round of vote in the Delphi-style process for definition of optimal anti-TNF drug trough levels to achieve mucosal healing. Each of the eight specialists ranked the threshold values by agreement from rank 1 (strong disagreement) to rank 4 (strong agreement). Y-axis shows number of specialists choosing each rank. ADA, adalimumab; CZP, certolizumab; IFX, infliximab

**Adverse events**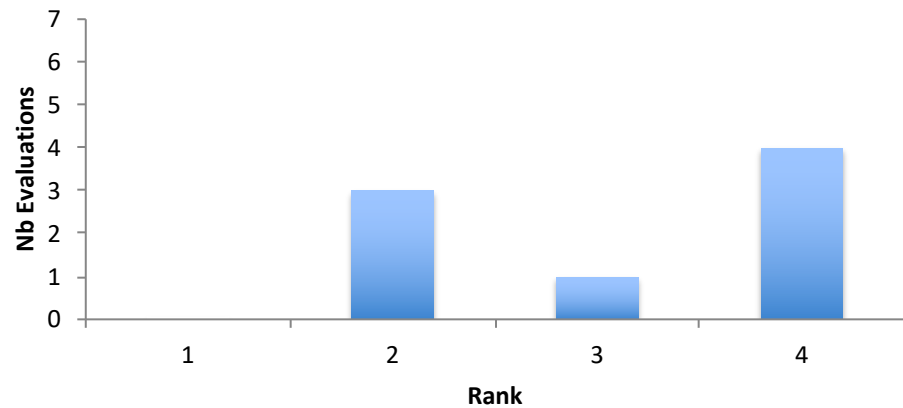**Loss of response**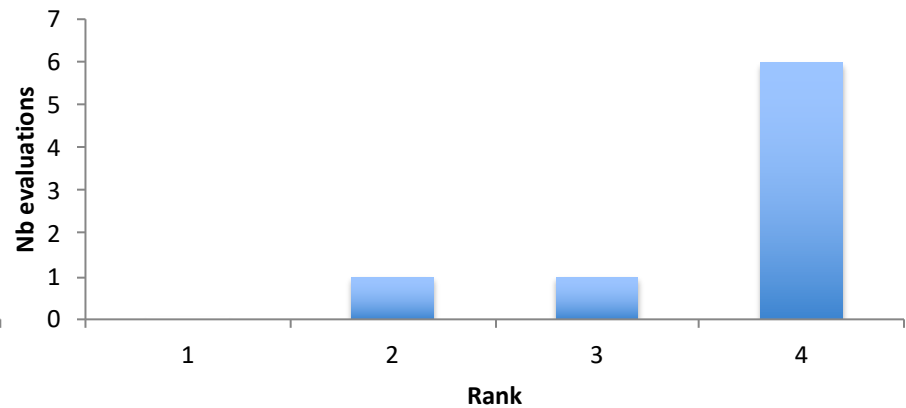**Mucosal healing**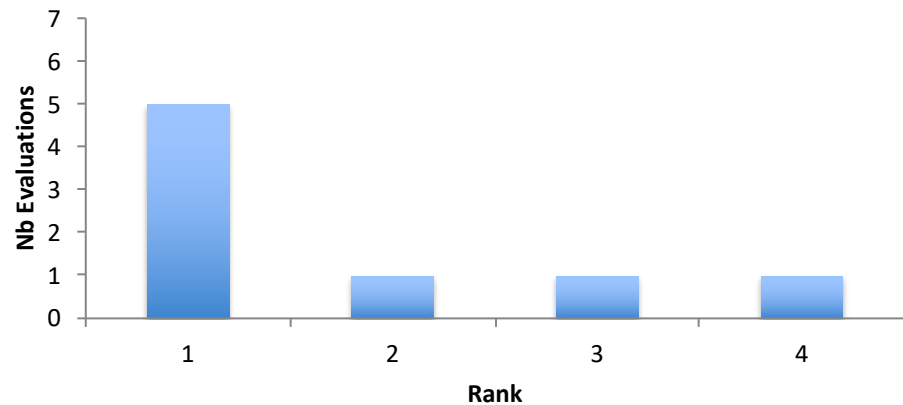**CRP levels**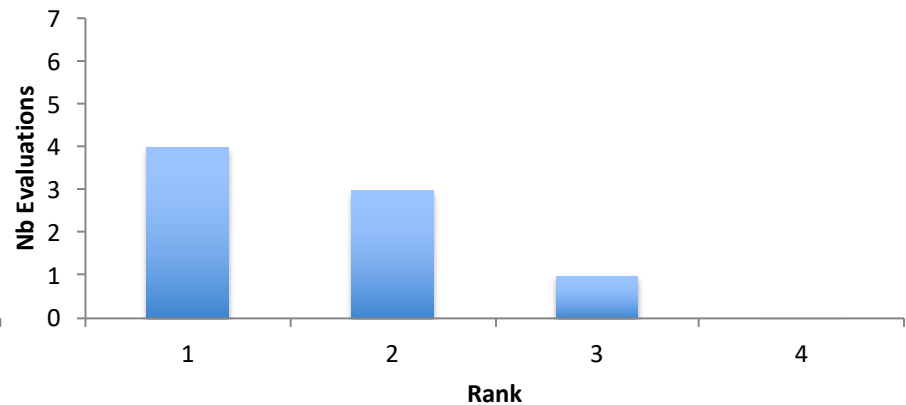**Calprotectin levels**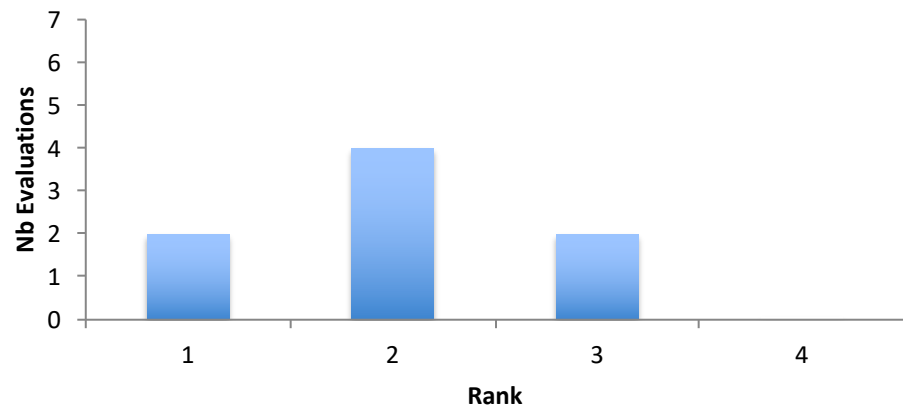

**Supplementary Figure 4:** Results after the first round of vote in the Delphi-style process for identification of outcomes that anti-drug-antibodies are predictive for. Each of the eight specialists ranked these outcomes by agreement from rank 1 (strong disagreement) to rank 4 (strong agreement). Y-axis shows number of specialists choosing each rank.

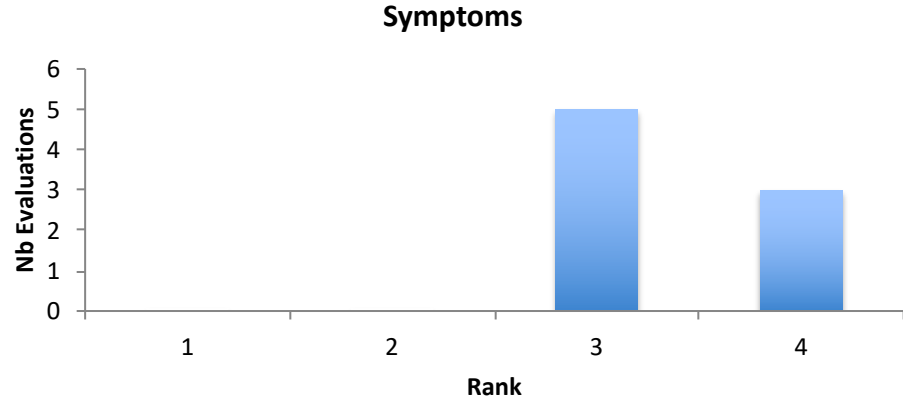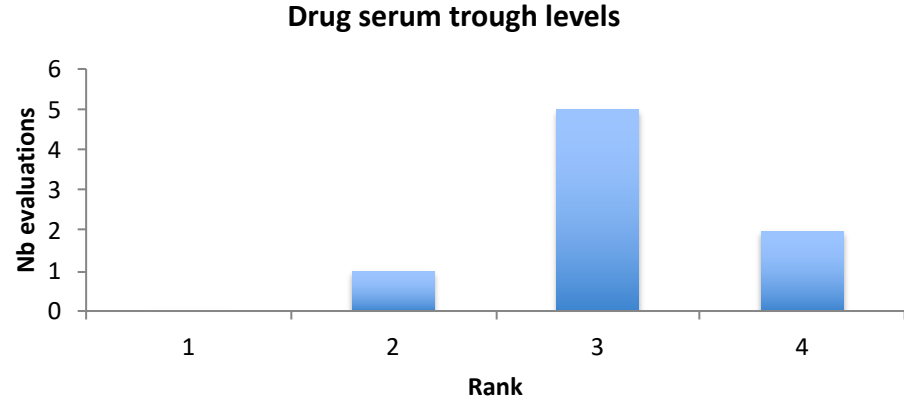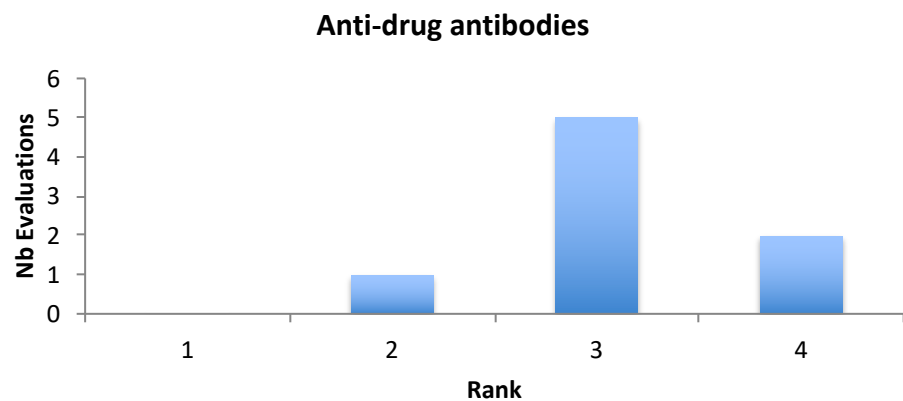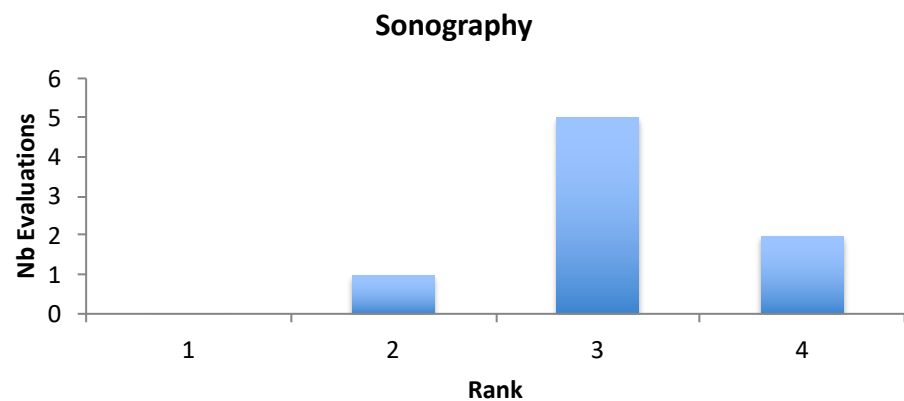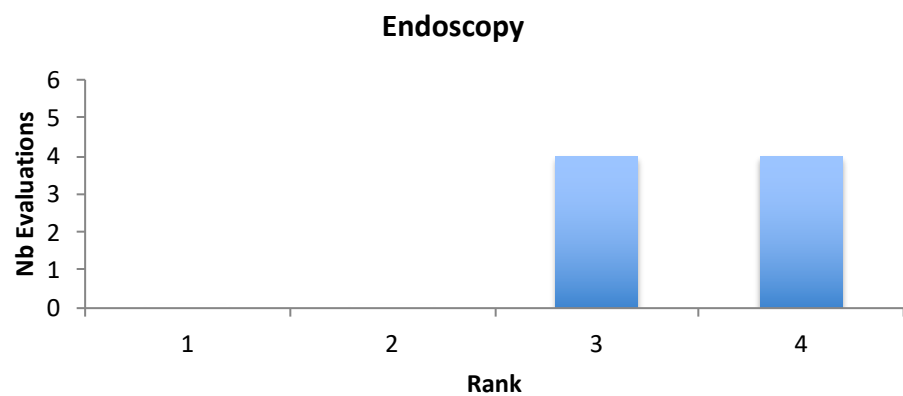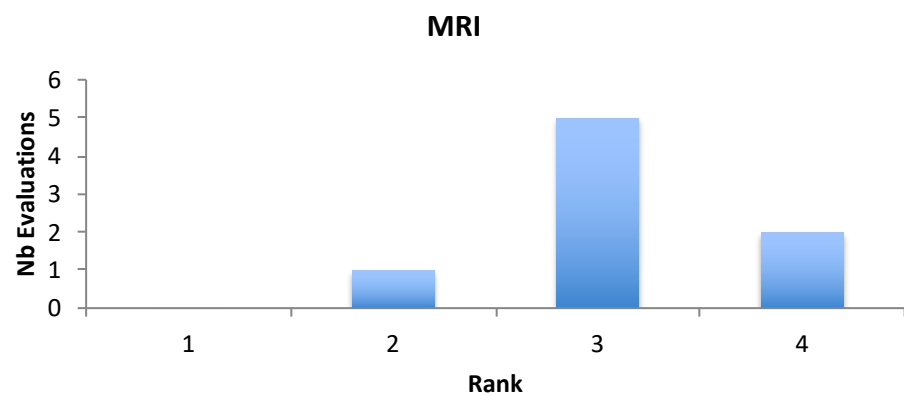

**Supplementary Figure 5:** Results after the first round of vote in the Delphi-style process for identification of key parameters required for clinical decision making in case of LOR to anti-TNF. Each of the eight specialists ranked these parameters by agreement from rank 1 (strong disagreement) to rank 4 (strong agreement). Y-axis shows number of specialists choosing each rank.
